SUPPLEMENT

Figure S1: Boxplots comparing the distribution of tree diameters within each plot type show no systematic difference across plot types.

## Tree Diameters Across Disturbance Types

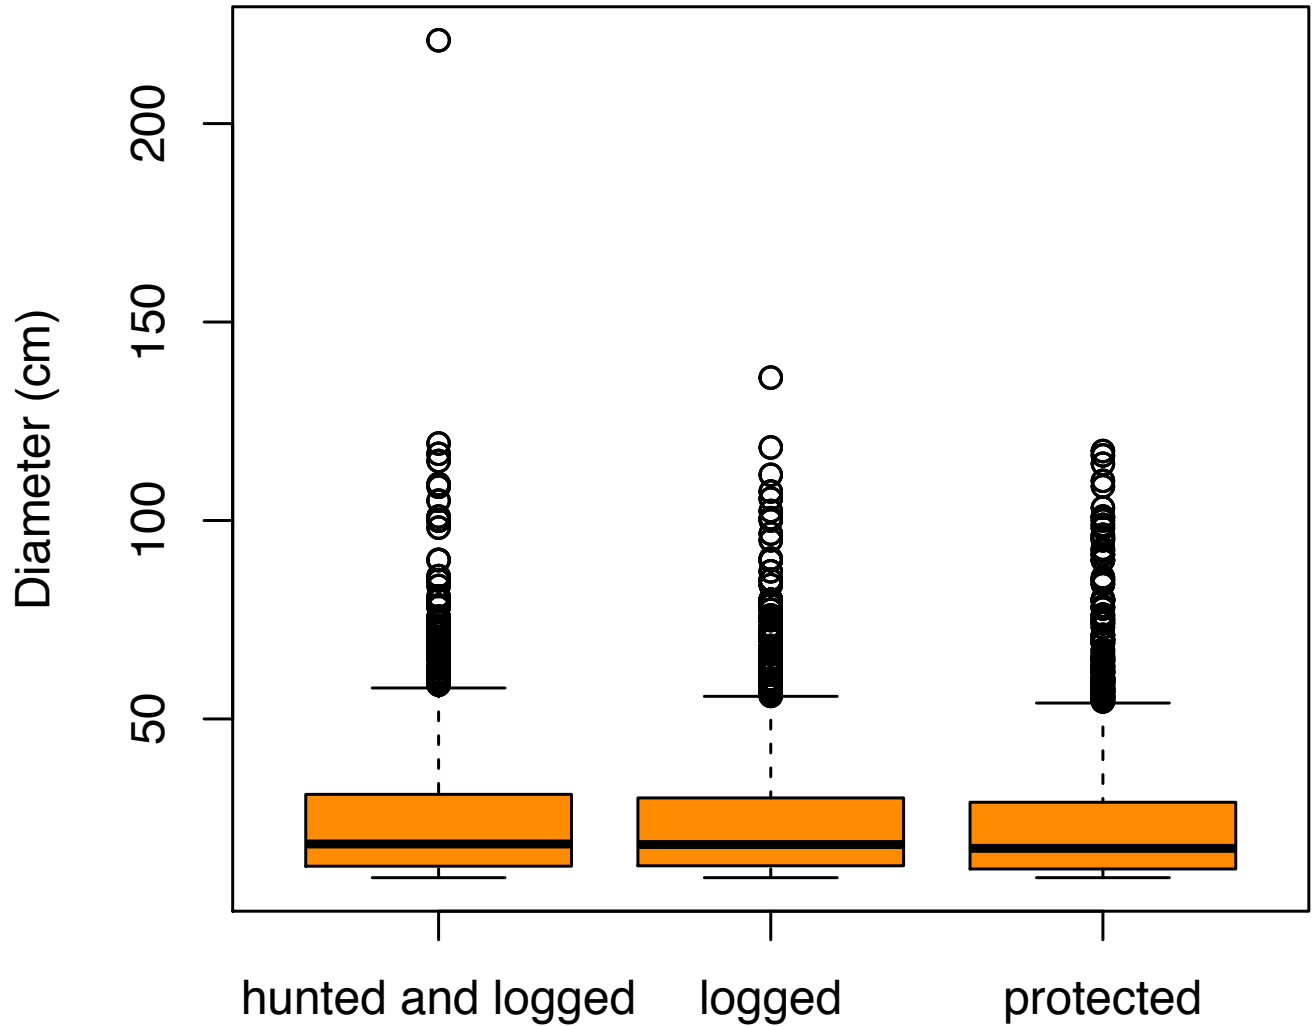

Figure S2: Boxplots comparing the distributions of total stems per plot show significant overlap across plot type.

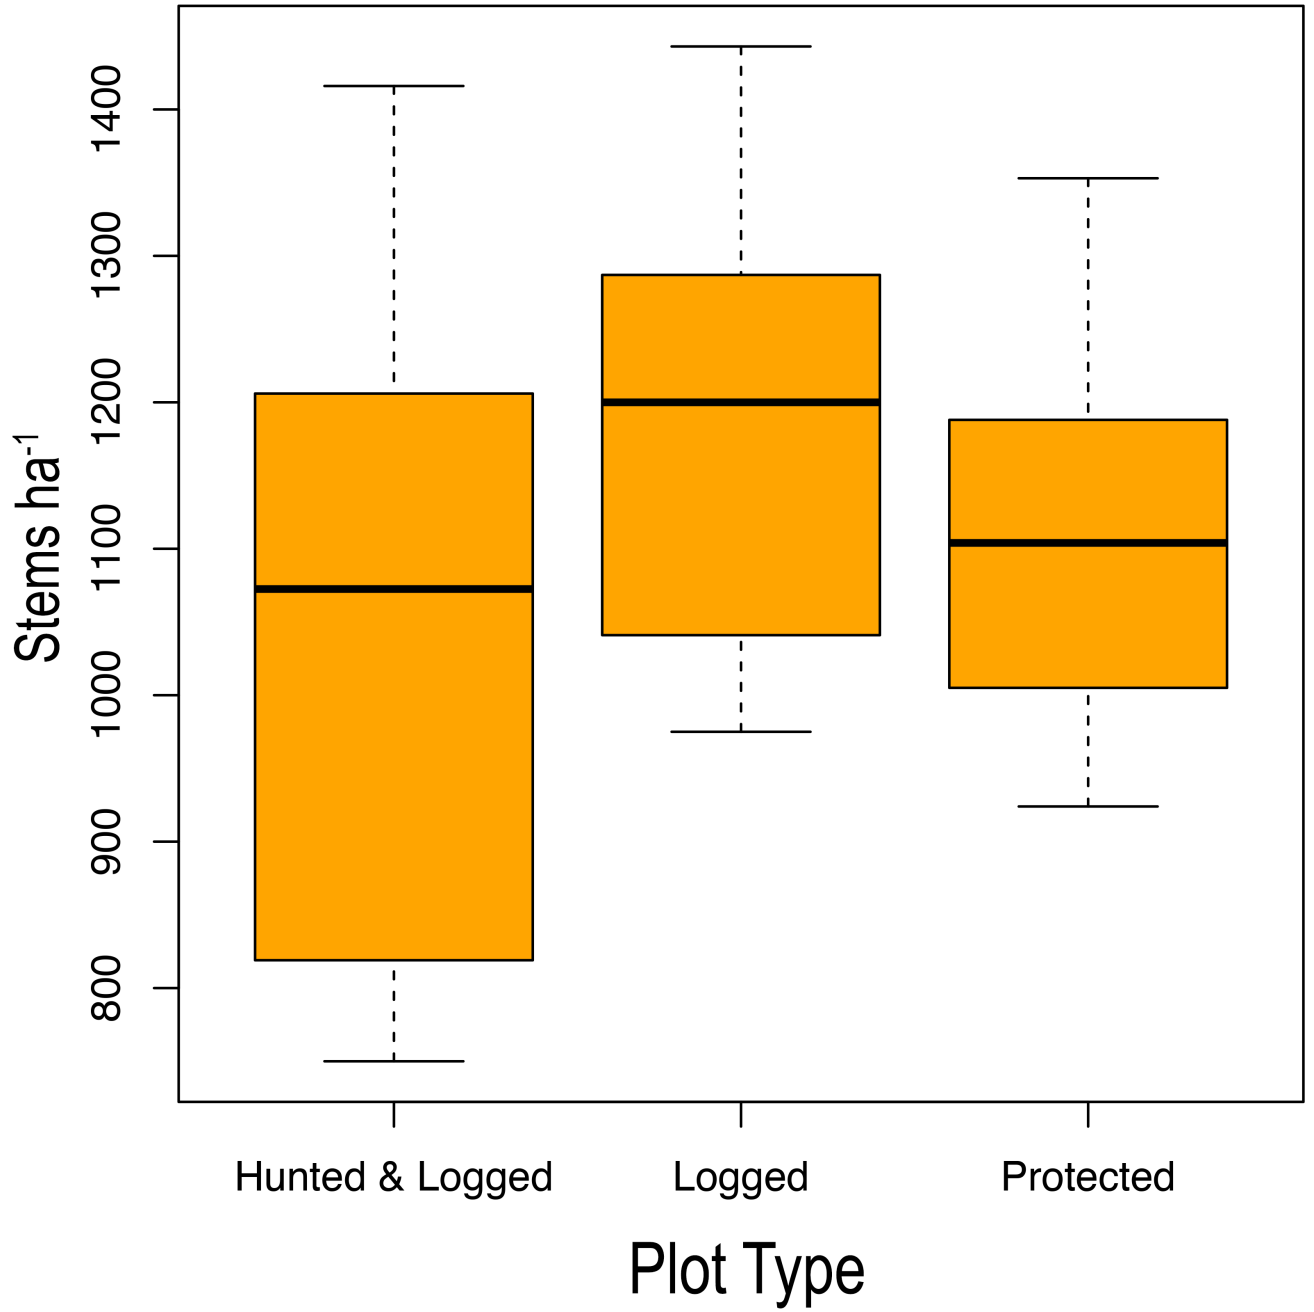

Figure S3: Stacked bar plots comparing community composition show a consistent distribution of 33 focal species across plots.

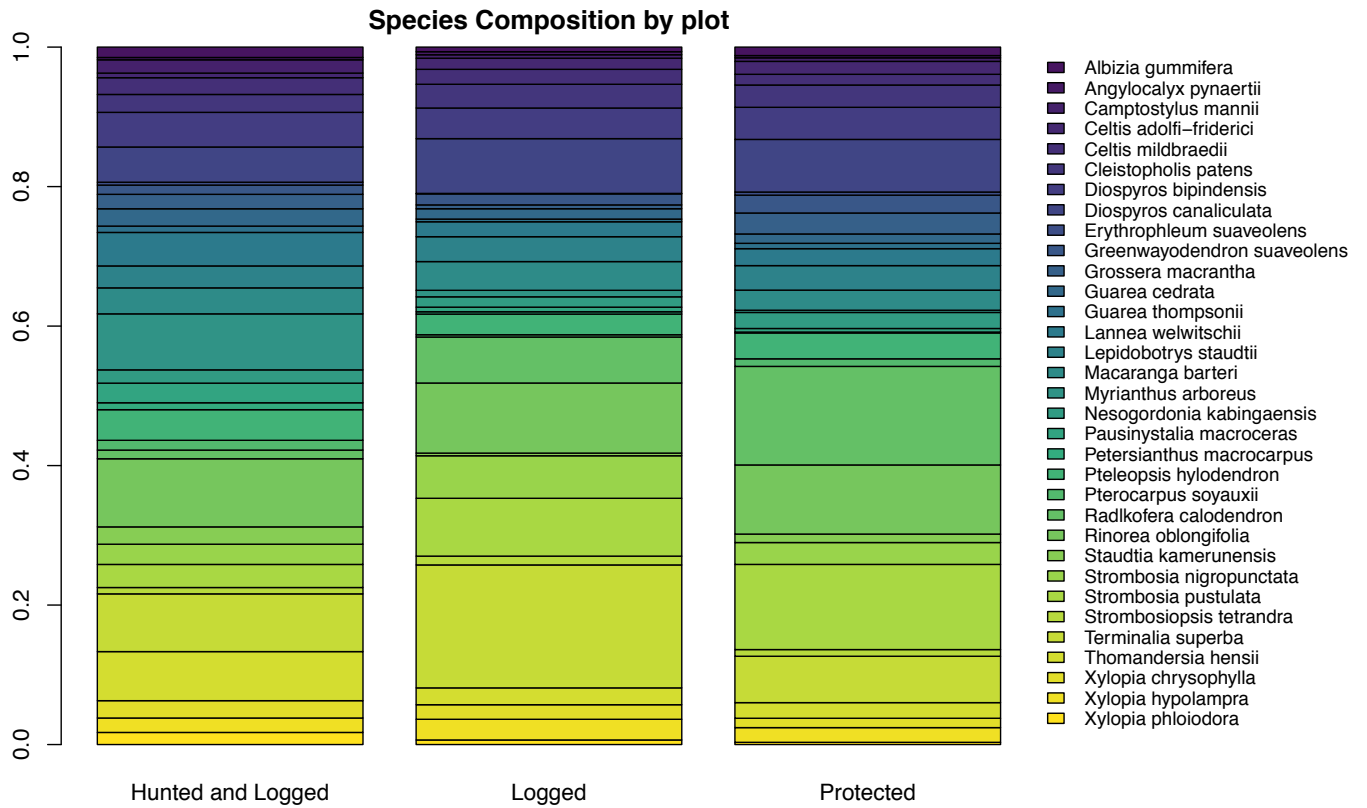

Figure S4: Comparison of standardized root mean squared prediction error (individual RMSPE/average number of seeds per trap) with size of circle indicating relative number of seeds from that species present in the study.

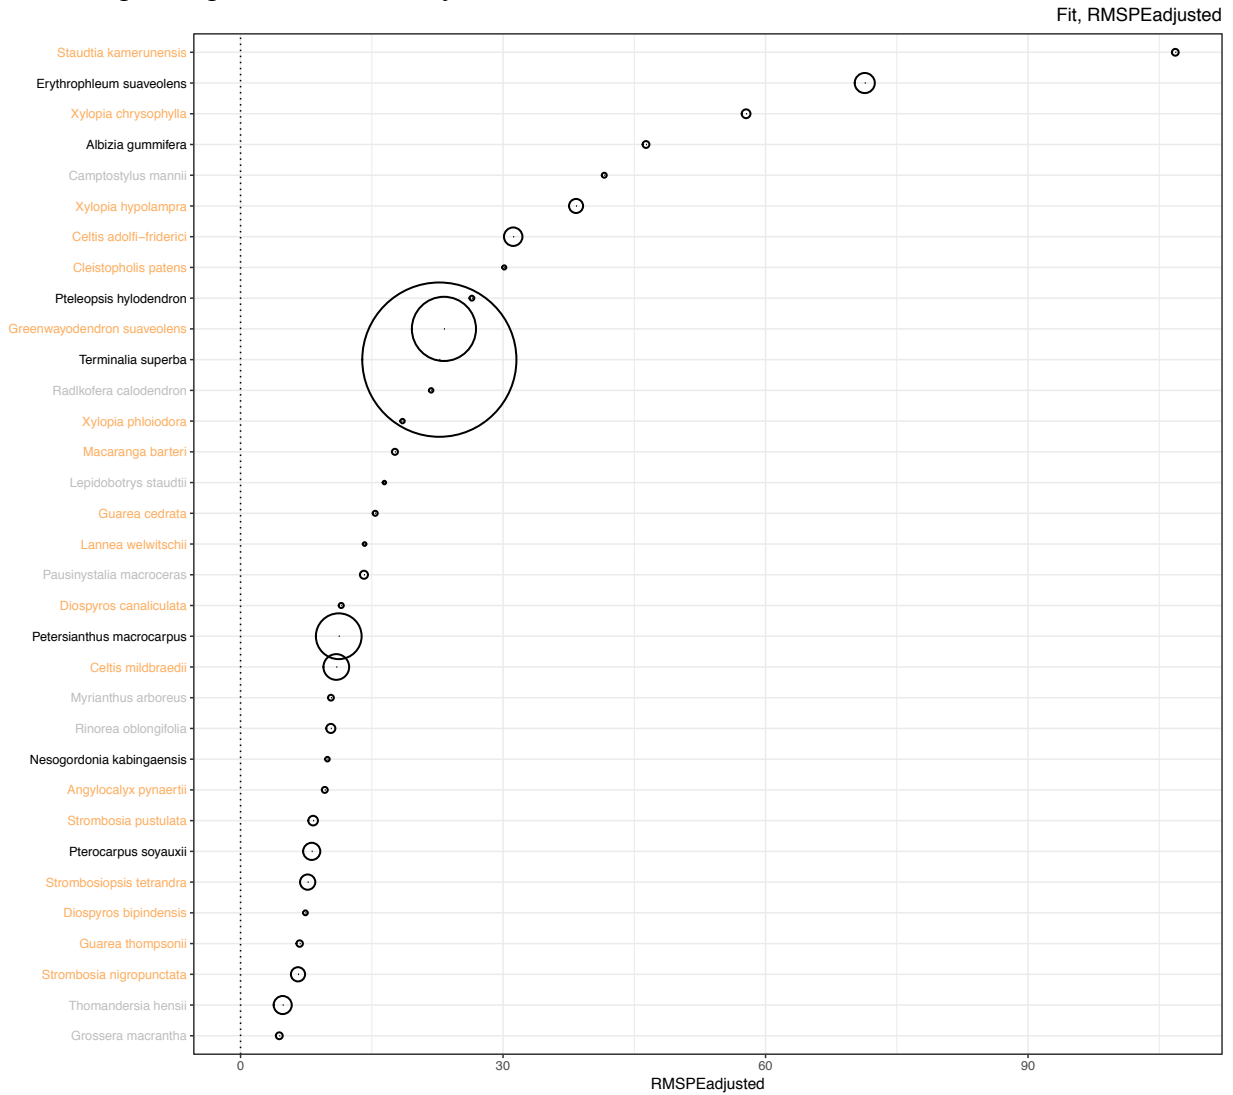

Figure S5 (A-D): Example of individual results (*Nesogordonia kabingaensis*) that were amalgamated across species for in-text summary figures.

S5A: comparison of the dispersal parameter and kernel mean dispersal distance among plot types.

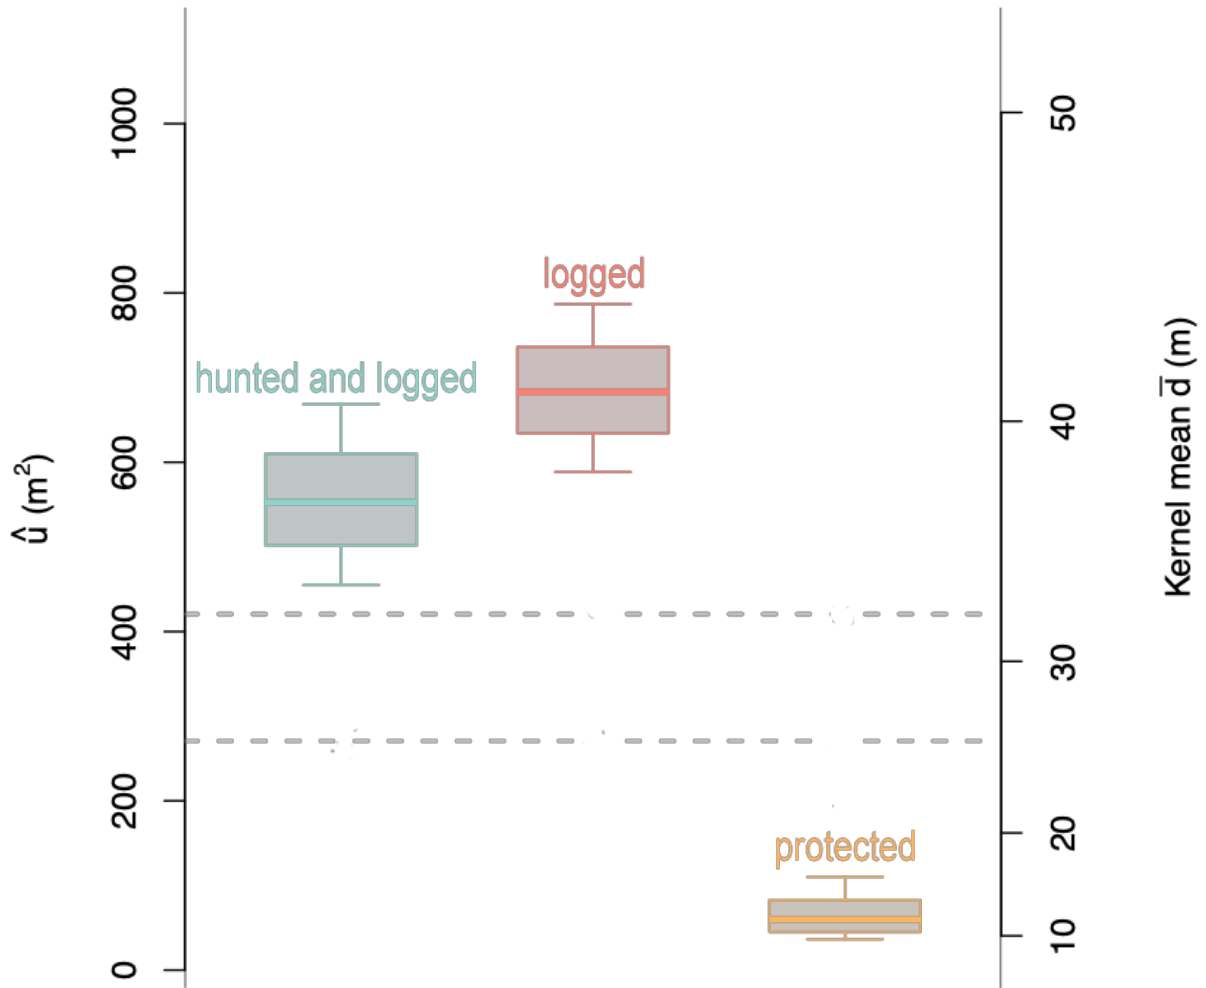

S5B: Posterior parameter estimates of maturation and fecundity for *Nesogordonia kabingaensis*.

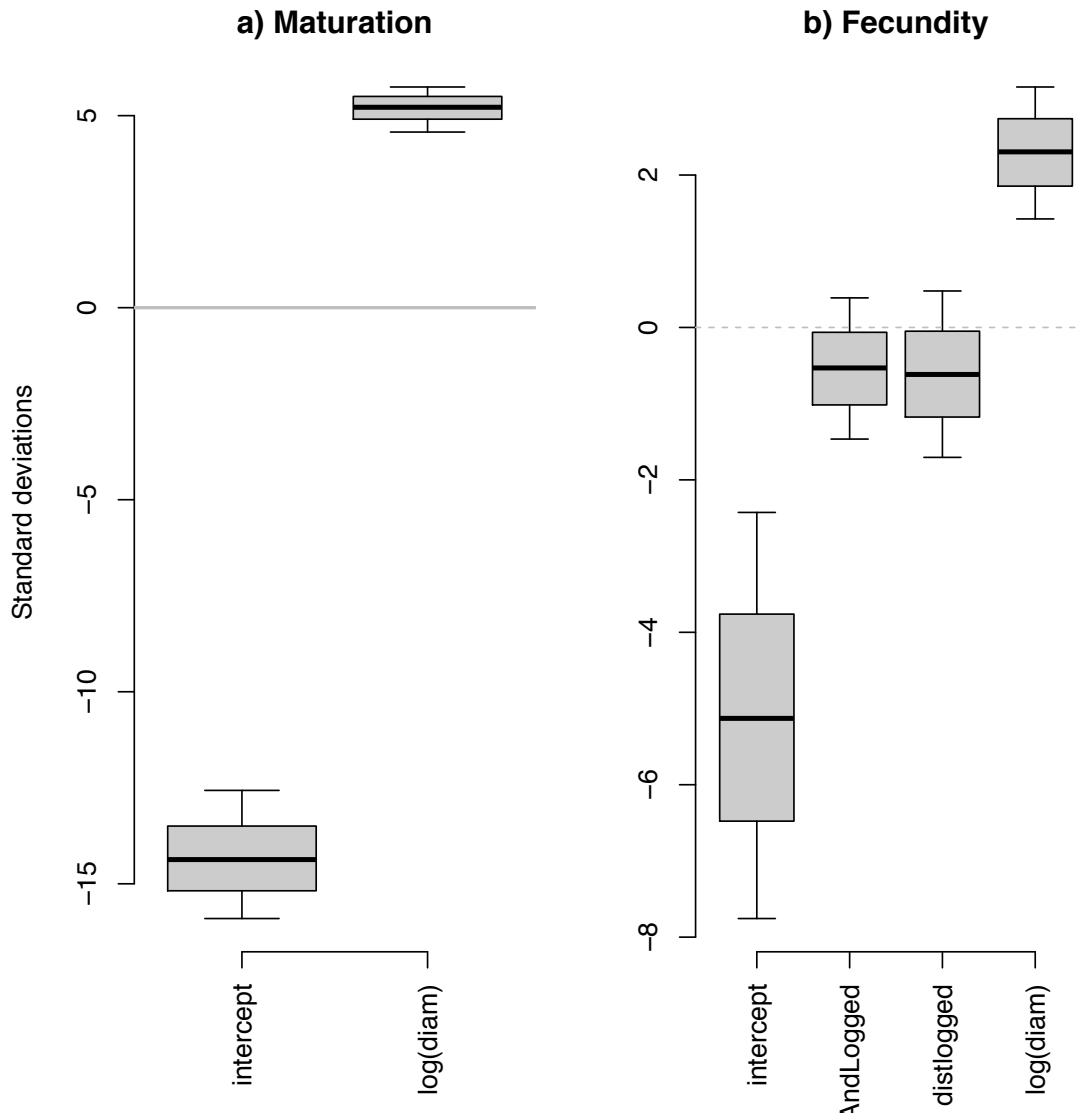

S5C: Posterior estimate of maturity as a function of tree diameter for *Nesogordonia kabingaensis*.

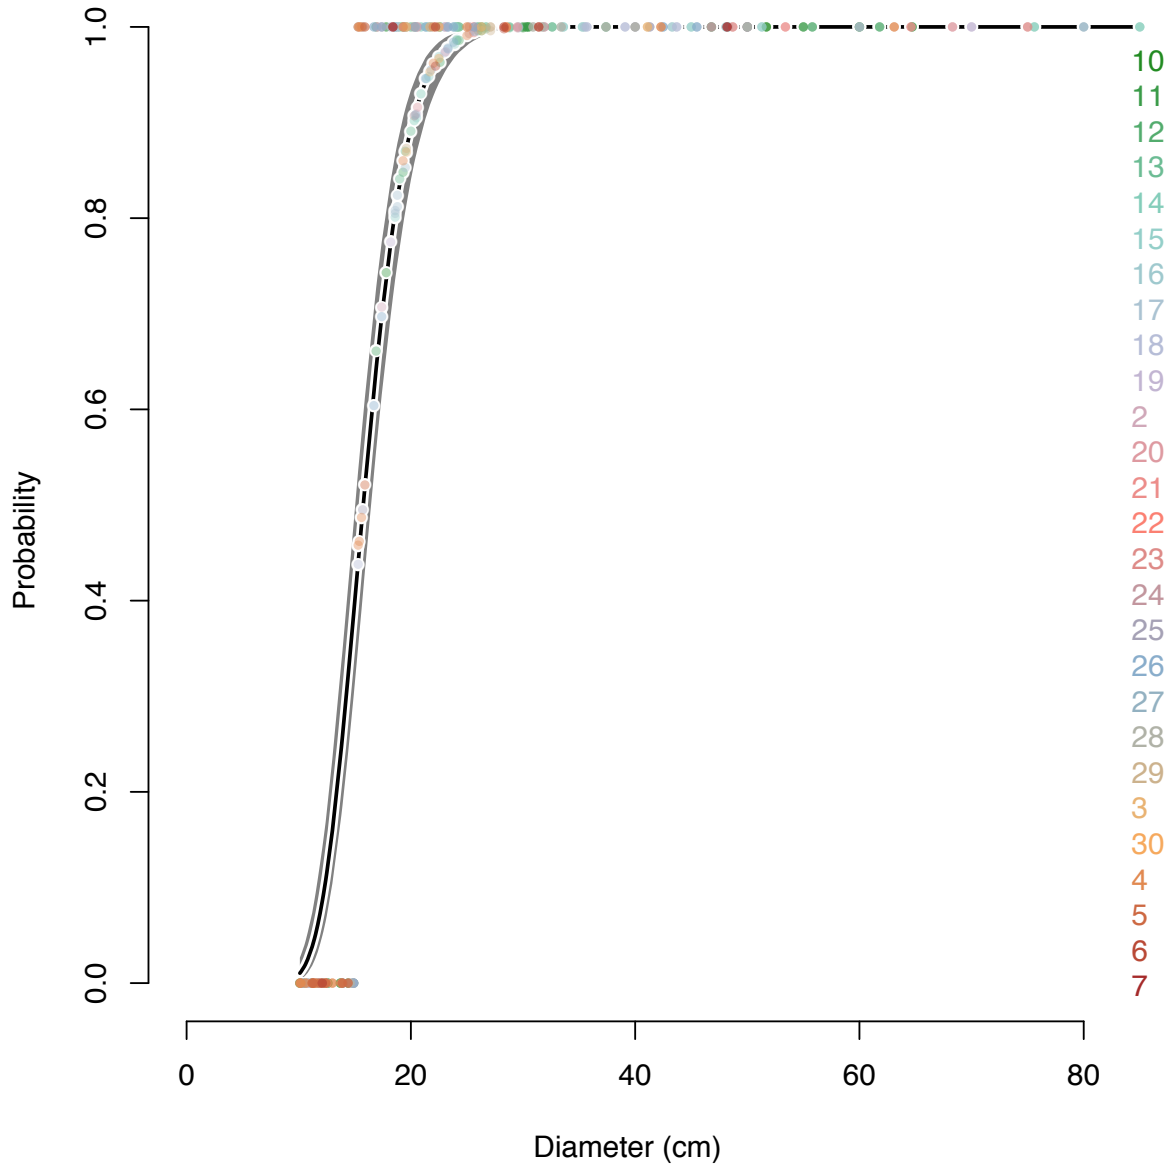

S5D: Comparison of seed dispersal kernels with 95% CI across plot types for *Nesogordonia kabingaensis*.

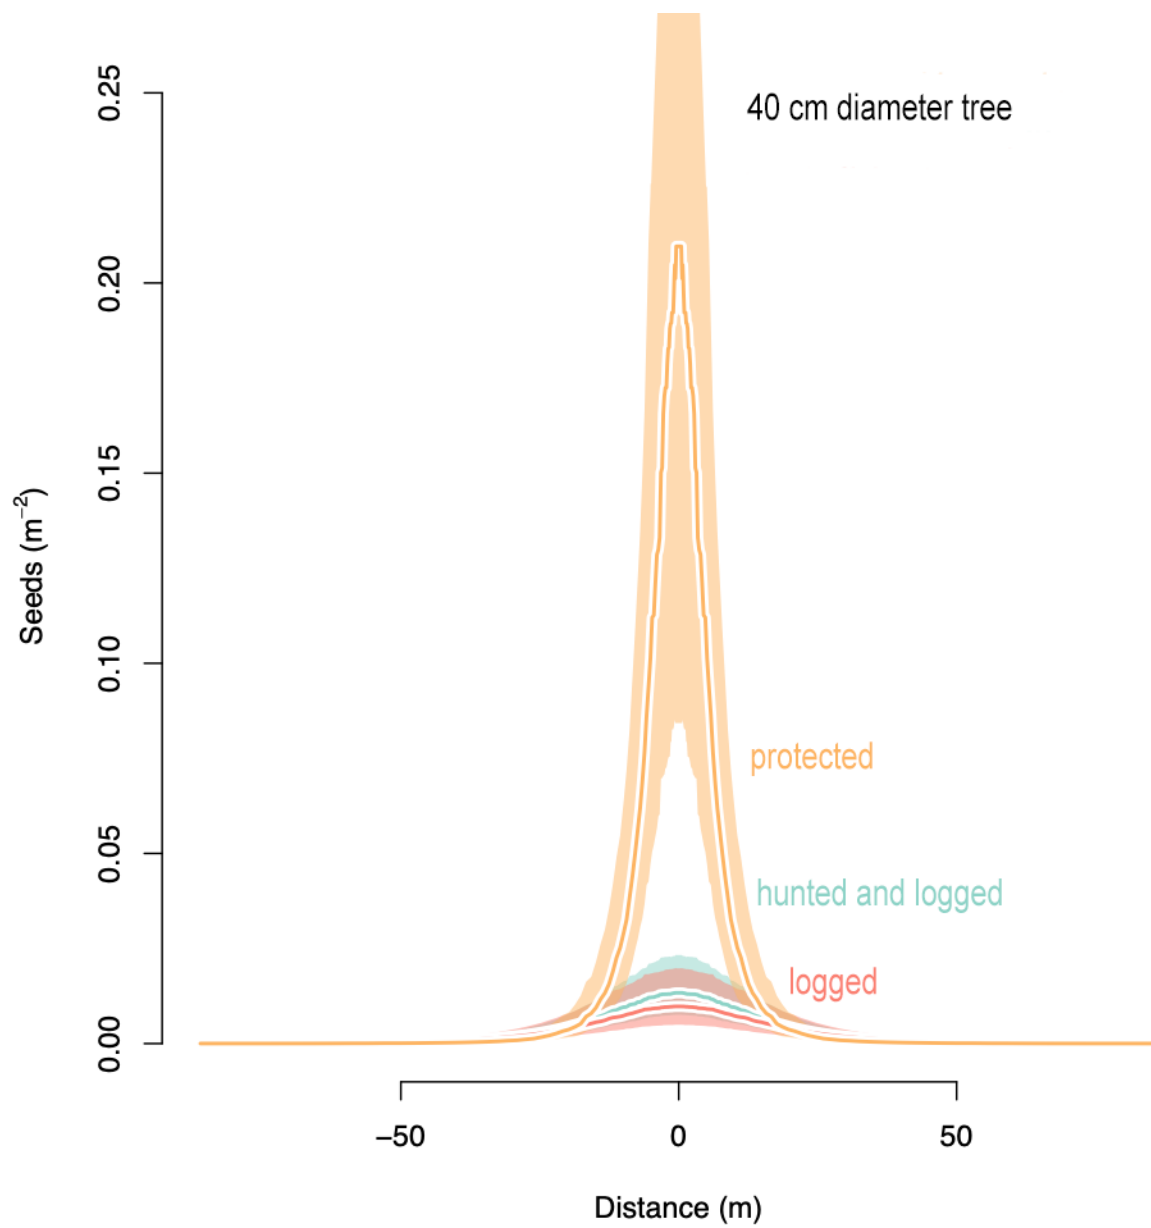



S6 (A-C): Examples of model diagnostics for *Nesogordonia kabingaensis*.

S6A: Trace plots of posterior chain convergence for all parameter values.

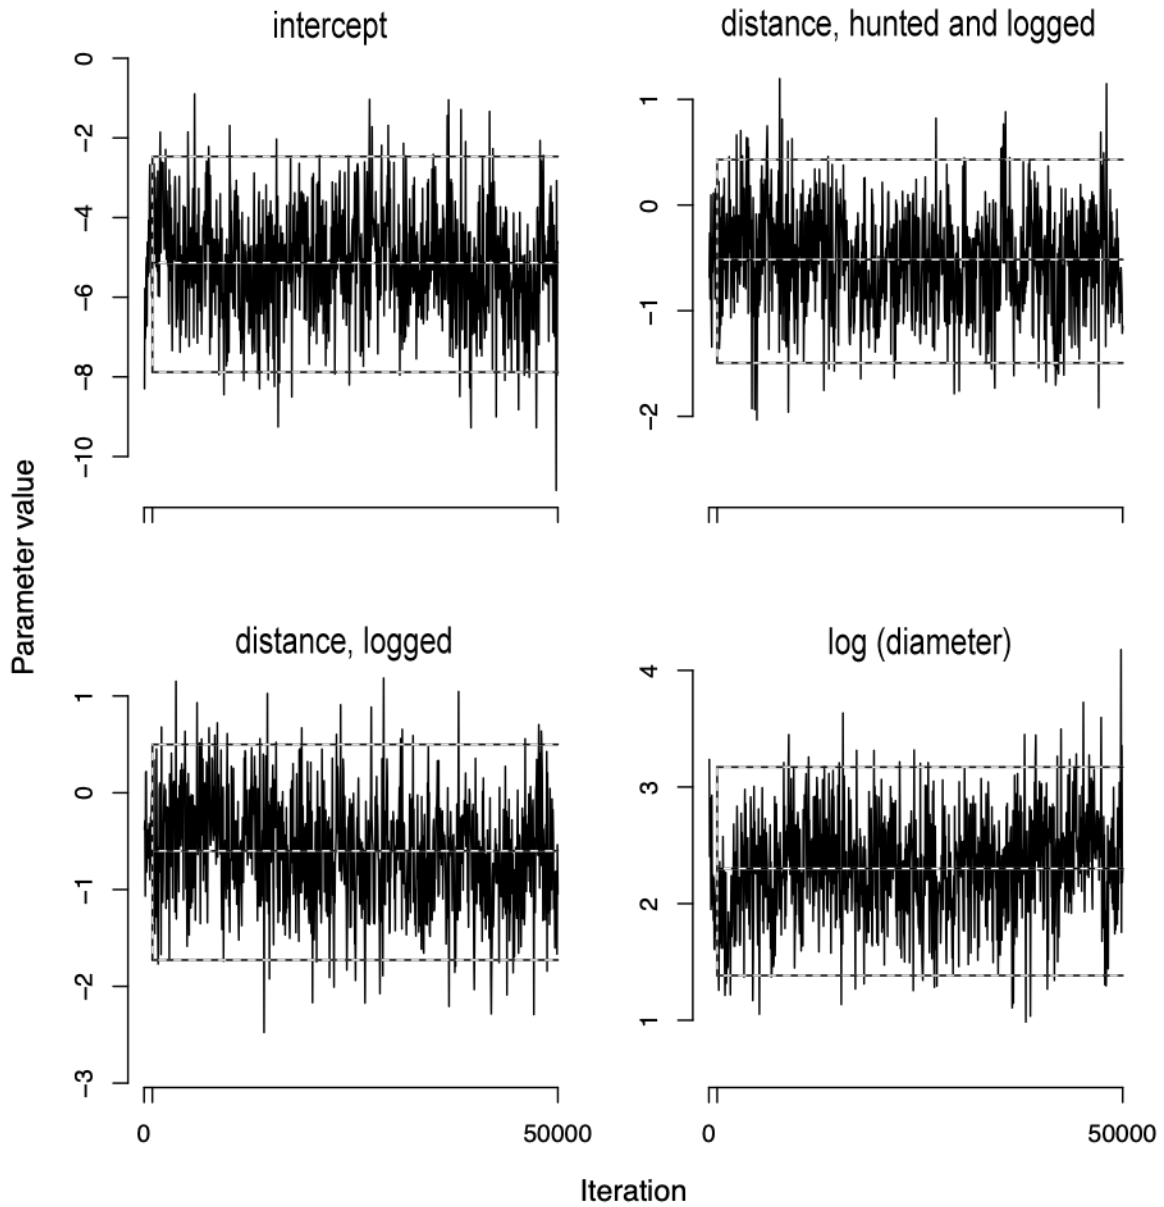

*S6B: Trace plots of posterior parameter estimates of dispersal distance across disturbance regimes.*

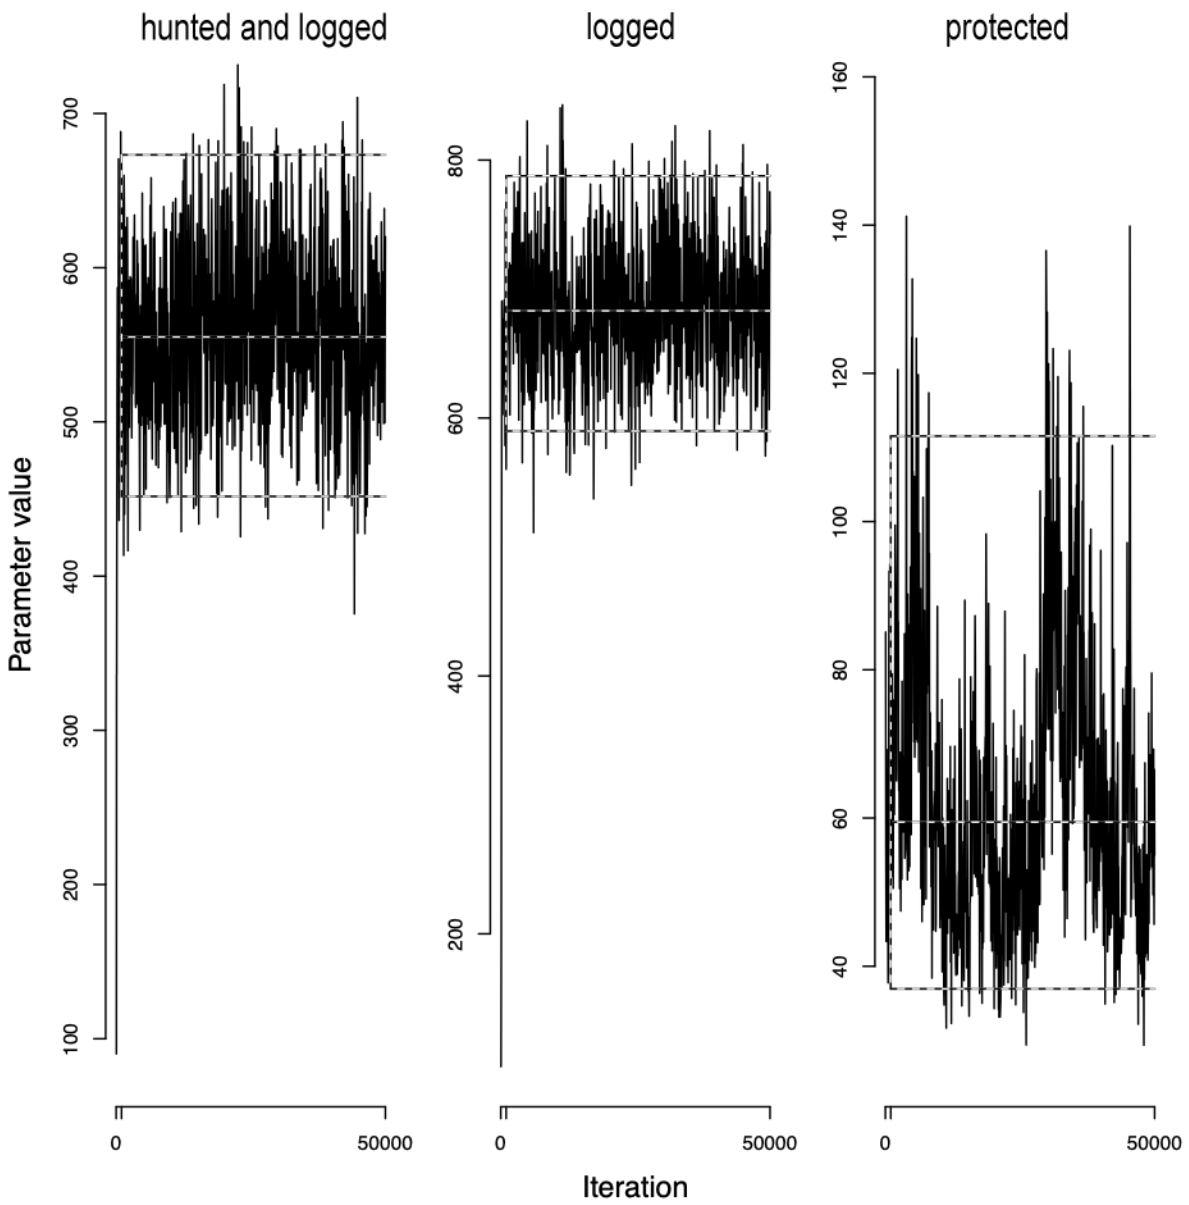

*S6C: Trace plots of posterior parameter estimates of sigma, root mean squared prediction error (RMSPE), and deviance.*

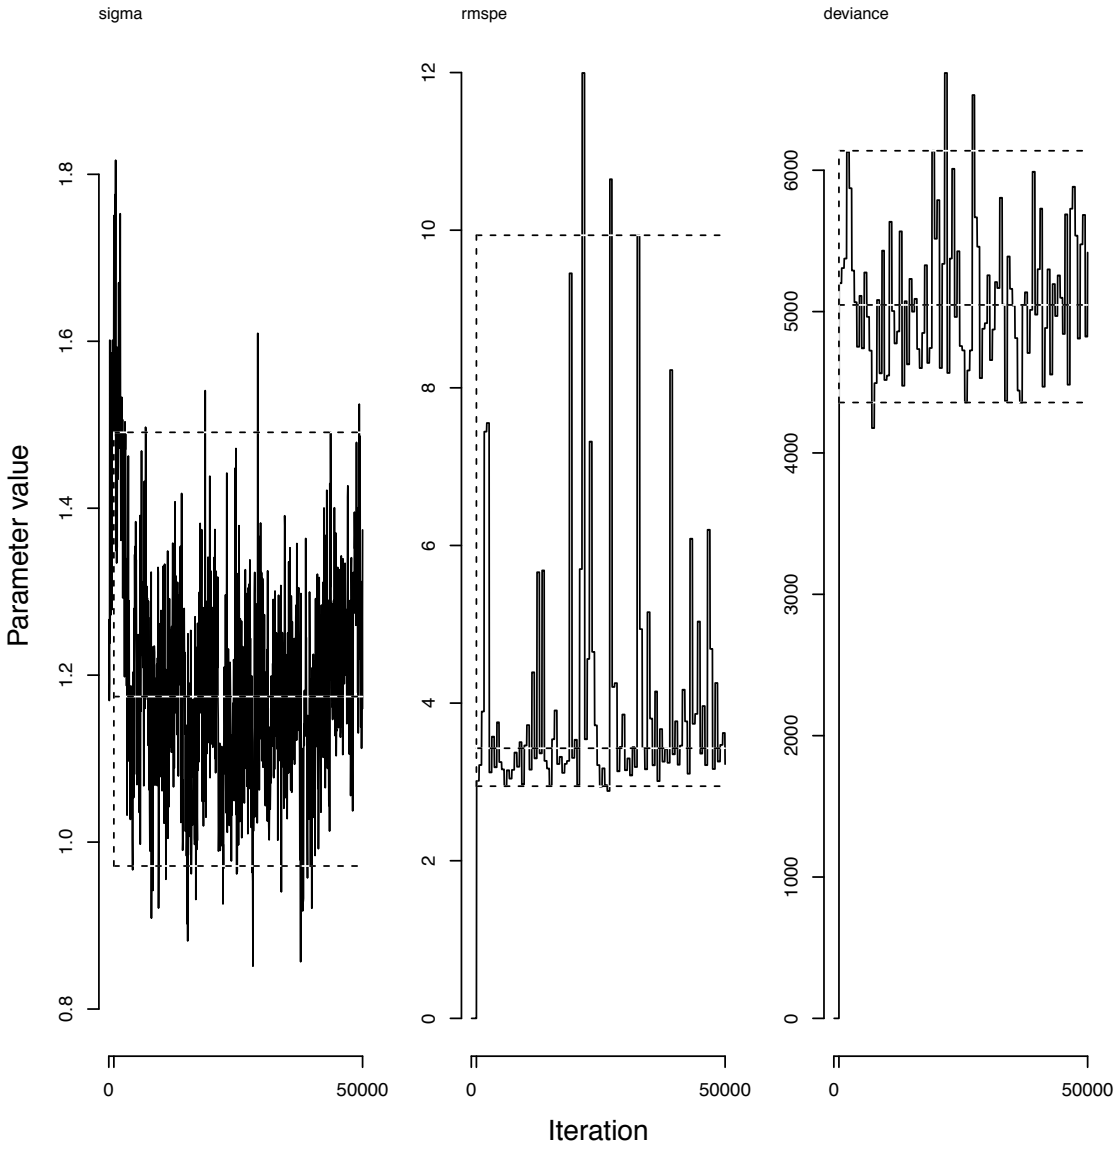

Table S1: Table of species information and dispersal vectors

|                                       | <u>Bird Dispersed?</u> | <u>Mammal Dispersed?</u> | <u>Timber Species?</u> |
|---------------------------------------|------------------------|--------------------------|------------------------|
| <b>Abiotically Dispersed</b>          |                        |                          |                        |
| <i>Albizia gummifera</i>              | no                     | no                       | no                     |
| <i>Erythrophleum suaveolens</i>       | no                     | no                       | yes                    |
| <i>Nesogordonia kabingaensis</i>      | no                     | no                       | yes                    |
| <i>Petersianthus macrocarpus</i>      | no                     | no                       | yes                    |
| <i>Pteleopsis hylodendron</i>         | no                     | no                       | yes                    |
| <i>Pterocarpus soyauxii</i>           | no                     | no                       | yes                    |
| <i>Terminalia superba</i>             | no                     | no                       | yes                    |
| <b>Animal Dispersed</b>               |                        |                          |                        |
| <i>Angylocalyx pynaertii</i>          | no                     | yes                      | yes                    |
| <i>Celtis adolfi-friderici</i>        | no                     | yes                      | yes                    |
| <i>Celtis mildbraedii</i>             | yes                    | yes                      | yes                    |
| <i>Cleistopholis patens</i>           | yes                    | yes                      | yes                    |
| <i>Diospyros bipindensis</i>          | no                     | yes                      | yes                    |
| <i>Diospyros canaliculata</i>         | no                     | yes                      | yes                    |
| <i>Greenwayodendron suaveolens</i>    | yes                    | yes                      | yes                    |
| <i>Guarea cedrata</i>                 | yes                    | yes                      | yes                    |
| <i>Guarea thompsonii</i>              | yes                    | no                       | yes                    |
| <i>Lannea welwitschii</i>             | yes                    | yes                      | yes                    |
| <i>Macaranga barteri</i>              | yes                    | yes                      | yes                    |
| <i>Staudtia kamerunensis</i>          | yes                    | yes                      | yes                    |
| <i>Strombosia nigropunctata</i>       | yes                    | yes                      | yes                    |
| <i>Strombosia pustulata</i>           | yes                    | yes                      | no                     |
| <i>Strombosiopsis tetrandra</i>       | yes                    | yes                      | yes                    |
| <i>Xylopia chrysophylla</i>           | yes                    | yes                      | no                     |
| <i>Xylopia hypolampra</i>             | yes                    | yes                      | no                     |
| <i>Xylopia phloiodora</i>             | yes                    | yes                      | no                     |
| <b>Abiotic &amp; Animal Dispersed</b> |                        |                          |                        |
| <i>Camptostylus mannii</i>            | no                     | yes                      | no                     |
| <i>Grossera macrantha</i>             | no                     | yes                      | no                     |
| <i>Lepidobotrys staudtii</i>          | yes                    | yes                      | no                     |
| <i>Myrianthus arboreus</i>            | no                     | yes                      | no                     |
| <i>Pausinystalia macroceras</i>       | yes                    | yes                      | yes                    |
| <i>Radlkofera calodendron</i>         | yes                    | yes                      | yes                    |
| <i>Rinorea oblongifolia</i>           | no                     | yes                      | yes                    |
| <i>Thomandersia hensii</i>            | no                     | no                       | yes                    |
